# Supplementary material for: Assessment of the analytical performances and sample stability on ST Genesia system using the STG‐DrugScreen application
Source: PubMed Central journal article supplement — J Thromb Haemost. 2019 May 31;17(8):1273–87. doi: 10.1111/jth.14470 (PMC6852561; doi:10.1111/jth.14470), 2019-05-31
Supplement: JTH-17-1273-s001.pdf [file JTH-17-1273-s001.pdf]

## STG-DrugScreen

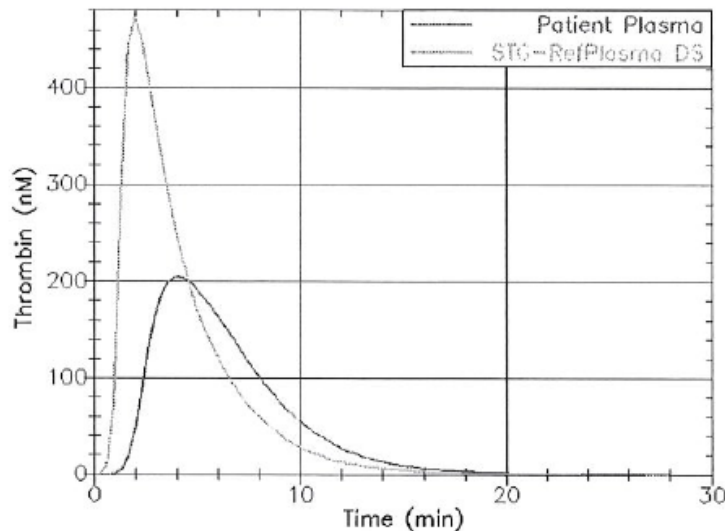

| Absolute Results    |       | Normalized Results   |       |
|---------------------|-------|----------------------|-------|
| Lag Time (min)      | 1.84  | Lag Time (ratio)     | 1.94  |
| Peak Height (nM)    | 205.1 | Peak Height (%)      | 42.89 |
| Time to Peak (min)  | 4.11  | Time to Peak (ratio) | 1.97  |
| ETP (nM.min)        | 1268  | ETP (%)              | 71.94 |
| Vel. Index (nM/min) | 130.9 | Vel. Index (%)       | 17.47 |
| Start Tail (min)    | 18.09 | Start Tail (ratio)   | 1.45  |
